# Supplementary material for: Garbage in, Garbage Out: Data Collection, Quality Assessment and Reporting Standards for Social Media Data Use in Health Research, Infodemiology and Digital Disease Detection
Source: PubMed Central journal article supplement (PMC4788740; doi:10.2196/jmir.4738), 2016-02-26
Supplement: jmir_v18i2e41_app1.pdf [file jmir_v18i2e41_app1.pdf]

## Multimedia Appendix 1. The sample size simulation for human coding

**Case 1:** We conducted simulation in order to determine sample size for each stratum. Data were generated assuming the population size of 4 million, retrieval precision of 95%, and retrieval recall of 84%. The retrieved ( $n_1$ ) to the unretrieved ( $n_2$ ) ratio was 1 to 39, and prevalence was set 2.8%. Let  $m$  be the sample size for retrieved data and  $k$  be the sample size for unretrieved data. We randomly sampled  $m$  out of  $n_1$  and  $k$  out of  $n_2$ , computed precision and recall on the sampled data, and checked whether their 95% confidence intervals included the true values. We replicated this many times to obtain the average confidence intervals.

The variability of retrieval recall estimate is affected by the size  $k$ . Therefore, we repeated the simulation by increasing  $k$  at a fixed value of  $m$ . Figure 2 displays how the average confidence intervals for recall estimates change as  $k$  increases from 1,000 to 8,000 while  $m$  is fixed at 3,000. The gain in variability reduction for recall estimate is small when  $k$  is above 6000. The simulation results for  $m=2,000$  are presented in the table below; they show a similar pattern. The coverage probability of all precision estimates was satisfactory.

**Case 2:** We also considered another scenario that the population size was 10 million, retrieval precision and recall were 92% and 85% respectively. The  $n_1$  to  $n_2$  ratio was approximately 1 to 815, and prevalence was set 0.1%. We considered  $m=600$  and  $k=8,000$  to 30,000 because of the large  $n_2$ . The coverage probability for interval estimates of recall does not reach the desired level 95% in many cases, the variability around the estimate is still high even when  $k=30,000$ .

The simulation suggests that the ratio of  $n_1$  to  $n_2$  affects accuracy of the recall estimates; when the ratio is tiny, taking a sizeable sample of the unretrieved tweets may compensate for inaccuracy. But human coders can code only so much before fatigue interferes. To determine an appropriate sample size for human coding, a balance between the desired level of statistical precision and feasibility should be considered.

**Case 1:** population size of 4 million, the retrieved to the unretrieved ratio = 1:39, prevalence = .028, precision= .95, recall=.84

**Case 2:** population size of 10 million, the retrieved to the unretrieved ratio = 1:815, prevalence = .001, precision= .92, recall=.85

| Retrieved     |     | Unretrieved |      | Precision |        |        |      | Recall |        |        |      |
|---------------|-----|-------------|------|-----------|--------|--------|------|--------|--------|--------|------|
| <i>m</i>      | %   | <i>k</i>    | %    | Mean      | 95% L  | 95% U  | C(%) | Mean   | 95% L  | 95% U  | C(%) |
| <b>Case 1</b> |     |             |      |           |        |        |      |        |        |        |      |
| 3000          | 3   | 1,000       | 0.03 | 0.9500    | 0.9422 | 0.9578 | 95.3 | 0.8433 | 0.7163 | 0.9702 | 93.8 |
|               |     | 2,000       | 0.05 | 0.9501    | 0.9423 | 0.9579 | 95.0 | 0.8418 | 0.7494 | 0.9341 | 95.4 |
|               |     | 3,000       | 0.08 | 0.9499    | 0.9421 | 0.9577 | 93.6 | 0.8419 | 0.7660 | 0.9177 | 95.6 |
|               |     | 4,000       | 0.10 | 0.9501    | 0.9423 | 0.9579 | 94.2 | 0.8418 | 0.7759 | 0.9077 | 94.8 |
|               |     | 5,000       | 0.13 | 0.9500    | 0.9422 | 0.9578 | 95.8 | 0.8412 | 0.7821 | 0.9003 | 96.0 |
|               |     | 6,000       | 0.15 | 0.9501    | 0.9423 | 0.9579 | 95.1 | 0.8409 | 0.7869 | 0.8950 | 95.4 |
|               |     | 7,000       | 0.18 | 0.9502    | 0.9424 | 0.9579 | 95.9 | 0.8422 | 0.7922 | 0.8922 | 96.8 |
|               |     | 8,000       | 0.21 | 0.9500    | 0.9422 | 0.9578 | 94.1 | 0.8427 | 0.7960 | 0.8895 | 96.4 |
| 2000          | 2   | 1,000       | 0.03 | 0.9500    | 0.9405 | 0.9595 | 95.0 | 0.8474 | 0.7215 | 0.9734 | 93.7 |
|               |     | 2,000       | 0.05 | 0.9499    | 0.9404 | 0.9595 | 95.2 | 0.8432 | 0.7512 | 0.9352 | 94.5 |
|               |     | 3,000       | 0.08 | 0.9498    | 0.9403 | 0.9594 | 97.0 | 0.8421 | 0.7663 | 0.9179 | 95.8 |
|               |     | 4,000       | 0.10 | 0.9501    | 0.9406 | 0.9597 | 94.3 | 0.8414 | 0.7754 | 0.9073 | 94.9 |
|               |     | 5,000       | 0.13 | 0.9502    | 0.9407 | 0.9597 | 94.7 | 0.8425 | 0.7835 | 0.9015 | 95.6 |
|               |     | 6,000       | 0.15 | 0.9499    | 0.9403 | 0.9594 | 93.0 | 0.8415 | 0.7875 | 0.8955 | 95.5 |
|               |     | 7,000       | 0.18 | 0.9497    | 0.9401 | 0.9592 | 94.9 | 0.8410 | 0.7910 | 0.8911 | 95.7 |
|               |     | 8,000       | 0.21 | 0.9499    | 0.9404 | 0.9595 | 94.7 | 0.8410 | 0.7941 | 0.8879 | 97.1 |
| <b>Case 2</b> |     |             |      |           |        |        |      |        |        |        |      |
| 600           | 4.9 | 8,000       | 0.08 | 0.9203    | 0.8987 | 0.941  | 94.7 | 0.8604 | 0.7306 | 1.0000 | 79.8 |
|               |     | 10,000      | 0.10 | 0.9200    | 0.8984 | 0.9417 | 95.2 | 0.8572 | 0.7291 | 1.0000 | 87.4 |
|               |     | 12,000      | 0.12 | 0.9201    | 0.8985 | 0.9417 | 94.7 | 0.8562 | 0.7327 | 1.0000 | 91.3 |
|               |     | 14,000      | 0.14 | 0.9203    | 0.8987 | 0.9419 | 95.2 | 0.8559 | 0.7371 | 1.0000 | 94.0 |
|               |     | 16,000      | 0.16 | 0.9204    | 0.8988 | 0.9420 | 95.4 | 0.8540 | 0.7394 | 1.0000 | 82.8 |
|               |     | 18,000      | 0.18 | 0.9201    | 0.8985 | 0.9418 | 95.4 | 0.8537 | 0.7431 | 0.9994 | 87.6 |
|               |     | 20,000      | 0.20 | 0.9201    | 0.8985 | 0.9417 | 94.9 | 0.8531 | 0.7462 | 0.9916 | 90.1 |
|               |     | 22,000      | 0.22 | 0.9199    | 0.8982 | 0.9416 | 95.2 | 0.8528 | 0.7494 | 0.9847 | 93.4 |
|               |     | 24,000      | 0.24 | 0.9198    | 0.8981 | 0.9414 | 95.4 | 0.8523 | 0.7517 | 0.9788 | 94.5 |
|               |     | 26,000      | 0.26 | 0.9201    | 0.8985 | 0.9418 | 95.2 | 0.8529 | 0.7554 | 0.9740 | 89.7 |
|               |     | 28,000      | 0.28 | 0.9198    | 0.8981 | 0.9415 | 94.5 | 0.8530 | 0.7582 | 0.9697 | 91.7 |
|               |     | 30,000      | 0.30 | 0.9198    | 0.8981 | 0.9415 | 95.0 | 0.8527 | 0.7605 | 0.9652 | 93.4 |

*m*= the sample size of retrieved data, *k*= the sample size of unretrieved data, % = sampling fraction in percentage. Each scenario was repeated 3000 times. The mean of point estimates and mean of 95% confidence limits are reported. The coverage probability C(%) shows how many times the 95% confidence intervals contain the true value.
