# Supplementary material for: Garbage in, Garbage Out: Data Collection, Quality Assessment and Reporting Standards for Social Media Data Use in Health Research, Infodemiology and Digital Disease Detection
Source: PubMed Central journal article supplement (PMC4788740; doi:10.2196/jmir.4738), 2016-02-26
Supplement: jmir_v18i2e41_app2.pdf [file jmir_v18i2e41_app2.pdf]

## Multimedia Appendix 2. Precision and recall estimation using only retrieved data

First the precision and its 95% confidence interval, denoted by  $(L_p, U_p)$ , within the retrieved data are calculated. Then our modified method takes the following steps:

- (1) Assign initial values of  $\pi$ ,  $S$ , and  $C$ .
- (2) Sample a value of precision from Uniform  $(L_p, U_p)$
- (3) Sample  $a$  from Binomial  $(n_1, \text{precision})$   
Sample  $c$  from Binomial  $\left(n_2, \frac{\pi(1-S)}{\pi(1-S)+(1-\pi)C}\right)$
- (4) Sample  $\pi$  from Beta  $(a + c + \alpha_\pi, n - a - c + \beta_\pi)$   
Sample  $S$  from Beta  $(a + \alpha_S, c + \beta_S)$   
Sample  $C$  from Beta  $(n_2 - c + \alpha_C, n_1 - a + \beta_C)$

A value of precision is sampled in step (2) from the Uniform distribution with lower and upper bounds equal to 95% confidence limits of the precision estimate. The steps (2)-(4) are repeated many times. The sampled values from the previous steps are used in the subsequent steps. A few different prior distributions may be tried to achieve robust results. We refer to Joseph et al. (1995) for derivation of posterior distributions [34].
