# Supplementary material for: Garbage in, Garbage Out: Data Collection, Quality Assessment and Reporting Standards for Social Media Data Use in Health Research, Infodemiology and Digital Disease Detection
Source: PubMed Central journal article supplement (PMC4788740; doi:10.2196/jmir.4738), 2016-02-26
Supplement: jmir_v18i2e41_app3.pdf [file jmir_v18i2e41_app3.pdf]

### Multimedia Appendix 3. Precision and recall estimation when human coding is not a standard classifier

Our modified method takes the following steps of Gibbs sampling:

- (1) Assign initial values for  $(\pi, S_1, S_2, C_1, C_2)$ .
- (2) Sample  $y_1$  from Binomial  $\left(a, \frac{\pi S_1 S_2}{\pi S_1 S_2 + (1-\pi)(1-C_1)(1-C_2)}\right)$ .  
 Sample  $y_2$  from Binomial  $\left(b, \frac{\pi S_1(1-S_2)}{\pi S_1(1-S_2) + (1-\pi)(1-C_1)C_2}\right)$ .  
 Sample  $y_3$  from Binomial  $\left(c, \frac{\pi(1-S_1)S_2}{\pi(1-S_1)S_2 + (1-\pi)C_1(1-C_2)}\right)$ .  
 Sample  $y_4$  from Binomial  $\left(d, \frac{\pi(1-S_1)(1-S_2)}{\pi(1-S_1)(1-S_2) + (1-\pi)C_1C_2}\right)$ .
- (3) Sample  $\pi$  from Beta  $(\sum_i y_i + \alpha_\pi, n - \sum_i y_i + \beta_\pi)$  for  $i = 1, 2, 3, 4$
- (4) Sample  $S_1$  from Beta  $(y_1 + y_2 + \alpha_{S_1}, y_3 + y_4 + \beta_{S_1})$   
 Sample  $C_1$  from Beta  $(c + d - (y_3 + y_4) + \alpha_{C_1}, a + b - (y_1 + y_2) + \beta_{C_1})$   
 Sample  $S_2$  from Beta  $(y_1 + y_3 + \alpha_{S_2}, y_2 + y_4 + \beta_{S_2})$   
 Sample  $C_2$  from Beta  $(b + d - (y_2 + y_4) + \alpha_{C_2}, a + c - (y_1 + y_3) + \beta_{C_2})$
- (5) Compute precisions by  $Precision_j = \frac{S_j \pi}{S_j \pi + (1-C_j)(1-\pi)}$  for  $j = 1, 2$

The steps (2)-(5) are repeated a large number of times. The step (5) is due to Bayes' Theorem.

The NPV may be obtained in Step (5) using the equation,

$$NPV_j = \frac{C_j(1-\pi)}{C_j(1-\pi) + (1-S_j)\pi} \quad \text{for } j = 1, 2.$$

A few different prior distributions and initial values may be tried to achieve robust results.
